# Supplementary material
Source: PubMed Central journal article supplement (PMC3601787)
Supplement: NIHMS293145-supplement-2.pdf [file NIHMS293145-supplement-2.pdf]

1  
2  
3  
4  
5  
6  
7  
8  
9  
10  
11  
12  
13  
14  
15  
16  
17  
18  
19  
20  
21  
22  
23  
24  
25  
26  
27  
28  
29  
30  
31  
32

Table S1. Information for Antibodies and Related Reagents Utilized in the Study

| <b>Antibody</b>        | <b>Purpose</b> | <b>Catalog #</b> | <b>Source</b>  |
|------------------------|----------------|------------------|----------------|
| $\beta$ -actin         | IB             | A1978            | Sigma          |
| Cdc2                   | IB and IP      | sc-54            | Santa Cruz     |
| Phospho-Tyr15-Cdc2     | IB             | 9111             | Cell Signaling |
| Cdc25A                 | IB             | sc-7389          | Santa Cruz     |
| Cdk4                   | IB             | MS-299           | Neomarkers     |
| Cdk4                   | IP             | sc-260AC         | Santa Cruz     |
| Cdk2                   | IB             | MS-617           | Neomarkers     |
| Cdk2                   | IP             | sc-163AC         | Santa Cruz     |
| Chk1                   | IB             | sc-8408          | Santa Cruz     |
| Phospho-Ser345-Chk1    | IB             | 2341             | Cell Signaling |
| Chk2                   | IB             | sc-5278          | Santa Cruz     |
| Phospho-Thr68-Chk2     | IB             | 2661             | Cell Signaling |
| Cyclin A               | IB             | MS-384           | Neomarkers     |
| Cyclin D               | IB             | sc-8396          | Santa Cruz     |
| Cyclin E               | IB             | sc-247           | Santa Cruz     |
| Cyclin E               | IP             | sc-248           | Santa Cruz     |
| p21                    | IB             | sc-6246          | Santa Cruz     |
| Phosphotyrosine (PY99) | IB             | sc-7020          | Santa Cruz     |
| Rb                     | IB             | 9309             | Cell Signaling |
| Phospho-Ser795-Rb      | IB             | 9301             | Cell Signaling |
| Phospho-Ser807/811-Rb  | IB             | 9308             | Cell Signaling |
| ECL Detection kit      | IB development | RPN2109          | Amersham       |
| HRP-linked mouse IgG   | IB development | NA931            | Amersham       |
| HRP-linked rabbit IgG  | IB development | NA934            | Amersham       |

IB, immunoblotting; IP, immunoprecipitating
